# Supplementary material for: Feature extraction from resolution perspective for gas chromatography-mass spectrometry datasets
Source: Royal Society of Chemistry journal article supplement (doi:10.1039/c6ra17864b), 2016-01-01
Supplement: c6ra17864b1.pdf [file c6ra17864b1.pdf]

## SUPPLEMENTARY MATERIALS

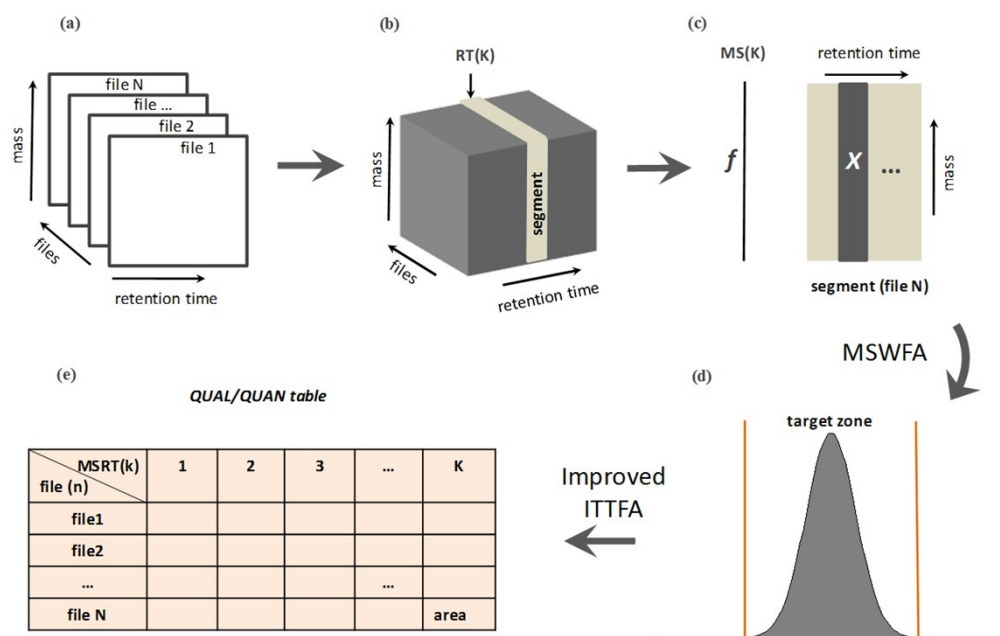

**Fig. S-1** Illustration of data analysis workflow of MARS. RT and MS are from MSRT list. (a) a large amount of chromatography mass spectrums; (b) a three-way array of GC-MS data; (c) and (d) graphical representation of sub-window matrix and target zone. (e) QUAL&QUAN table.

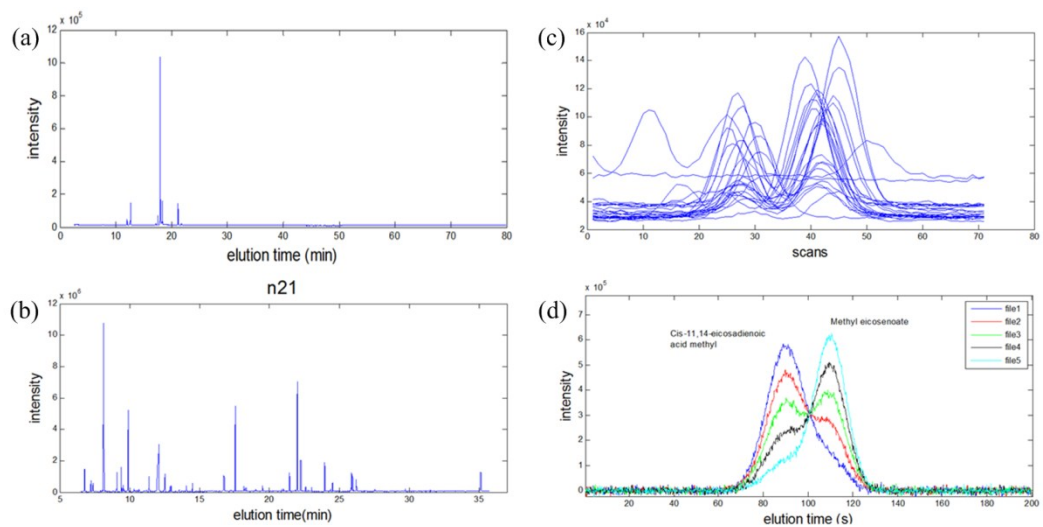

**Fig. S-2** Total ion chromatogram of test datasets. (a) peppermint sample, (b) human blood plasma sample, (c) red wine samples, (d) five simulated profiles.

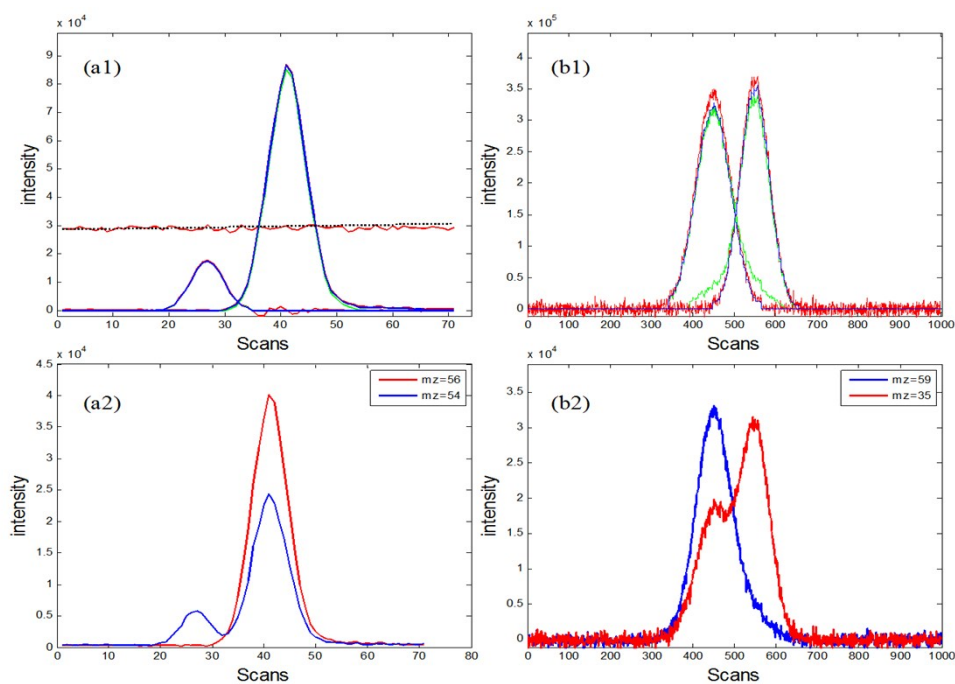

**Fig. S-3** Examples of extracted chromatogram by MARS, MCR-ALS, PARAFAC2 and XCMS. Two files are selected from peak cluster A and B respectively for illustration. (a1) and (b1) are resolved chromatographic profiles (Blue: MARS; Green: MCR-ALS; Red: PARAFAC2; Black: baseline by 2D least-squares fitting). (a2) and (b2) are selected ion chromatograms by XCMS.

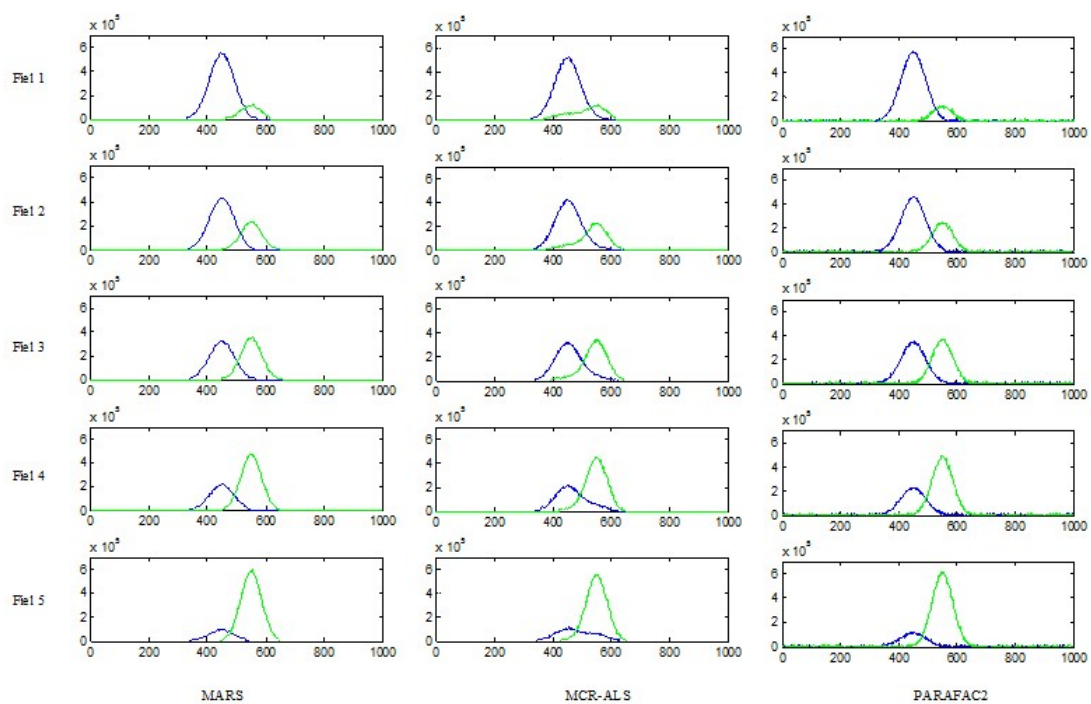

**Fig S-4** Resolution of five simulated profiles by MARS MCR-ALS and PARAFAC2. Blue: Cis-11,14-eicosadienoic acid; green: Methyl eicosenoate.

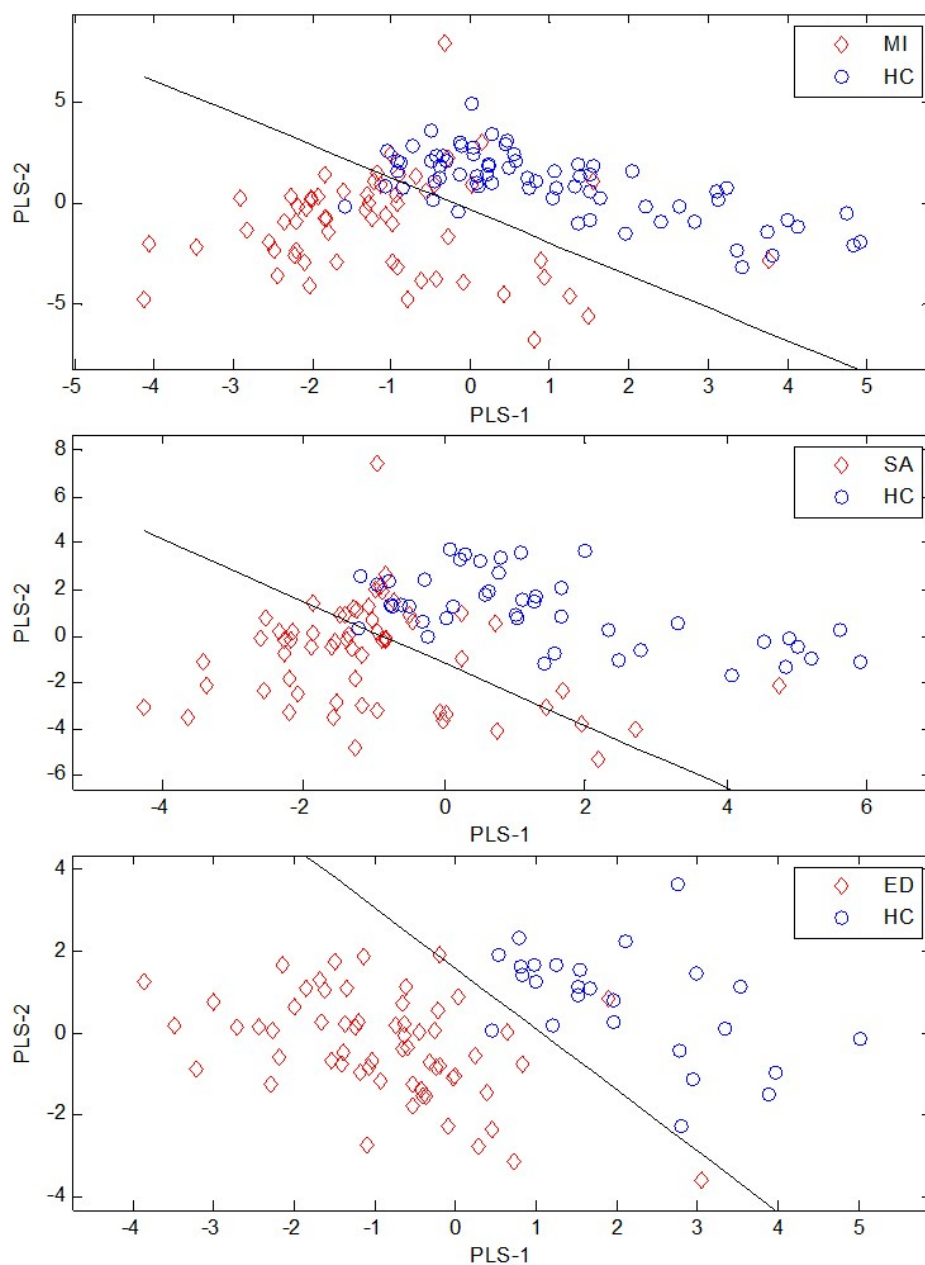

**Fig S-5 .**

**Fig. S-5** PLS-DA score plots of ED, SA, HC and MI. Latent variables used were 2 (MI vs HC), 5 (SA vs HC), 2 (ED vs HC).

**Table S-1** Qualitative and quantitative information of Dataset II, III, IV

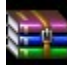

QUALQUAN\_table\_datasetII.zip

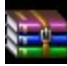

QUALQUAN\_table\_datasetIII.zip



QUALQUAN\_table\_datasetIV.zip

**Table S-2** Five profiles are simulated with different peak height, peak deviation and mass spectral. Firstly, five chromatograms were generated with two Gaussian peaks at different concentration. Then, random noise was added into simulated chromatograms. Next, two mass spectrums of two real standard compounds were obtained from NIST library. Finally, five 2D matrixes were obtained from the outer product of simulated chromatograms and pure mass spectrums.

| peaks | file1 | file2 | file3 | file4 | file5 | peak        | standard  | compounds                              |
|-------|-------|-------|-------|-------|-------|-------------|-----------|----------------------------------------|
|       | (cr)  | (cr)  | (cr)  | (cr)  | (cr)  | position(s) | deviation | mass spectral                          |
| peak1 | 1.00  | 0.80  | 0.60  | 0.40  | 0.20  | 90          | 60        | Cis-11,14-eicosadienoic<br>acid methyl |
| peak2 | 0.20  | 0.40  | 0.60  | 0.80  | 1.00  | 110         | 50        | Methyl eicosenoate                     |

cr: concentration ratio.

**Table S-3** Comprehensive comparison between MARS, XCMS, MCR-ALS and PARAFAC2 for processing GC-MS dataset.

| Methods  | Baseline correction | Alignment | Performance on overlapped peaks | Segmentation                                  | Parameters                                                                   | Speed                                                  |
|----------|---------------------|-----------|---------------------------------|-----------------------------------------------|------------------------------------------------------------------------------|--------------------------------------------------------|
| XCMS     | need                | need      | worse                           | not need                                      | parameters of baseline correction, peak detection and alignment <sup>a</sup> | fast, unsupervised, Automatic, batch processing        |
| MCR-ALS  | need                | not need  | good                            | manual operation                              | number of component factor                                                   | slow, processing part of dataset once                  |
| PARAFAC2 | not need            | not need  | good                            | manual operation                              | number of component factor                                                   | slow, processing part of dataset once                  |
| MARS     | not need            | not need  | good                            | automatic, a method based on MWSFA is applied | moving window size, threshold, optimization                                  | fast, unsupervised, batch processing (with known MSRT) |

a: different parameters depends on different methods of baseline correction, peak detection and alignment.
